# Supplementary material for: Si doped T-graphene: a 2D lattice as an anode electrode in Na ion secondary batteries
Source: Royal Society of Chemistry journal article supplement (doi:10.1039/d2nj01009g), 2022-01-01
Supplement: d2nj01009g1.pdf [file d2nj01009g1.pdf]

## Si doped T-graphene: a 2D lattice as an anode electrode in Na ion secondary batteries

Neha Yadav and T. J. Dhillip Kumar\*

*Quantum Dynamics Lab, Department of Chemistry,  
Indian Institute of Technology Ropar, Rupnagar 140001, India*

**Fig. S1:** Three diffusion pathways have been marked for diffusion of Na ion across the t-SiC<sub>3</sub> monolayer. Pathways along with energy barrier for Path 1 and Path 2 are shown below:

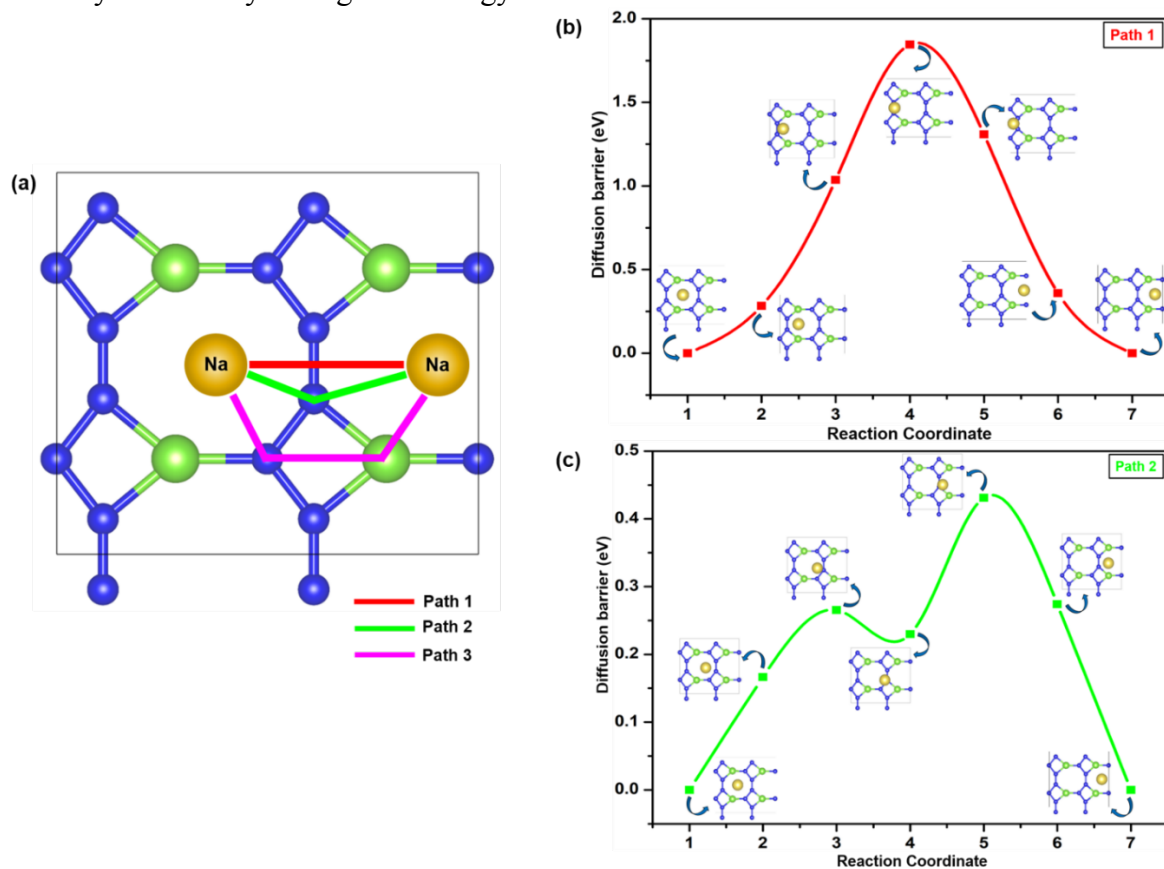

Fig. (a) Diffusion pathways for migration of Na ion across t-SiC<sub>3</sub> monolayer (b) Energy barrier profile for Path 1 (c) Energy barrier profile for Path 2

**Fig. S2:** The stepwise formation of layer 1, layer 2, layer 3 and layer 4 has been shown below to evaluate the storage capacity.

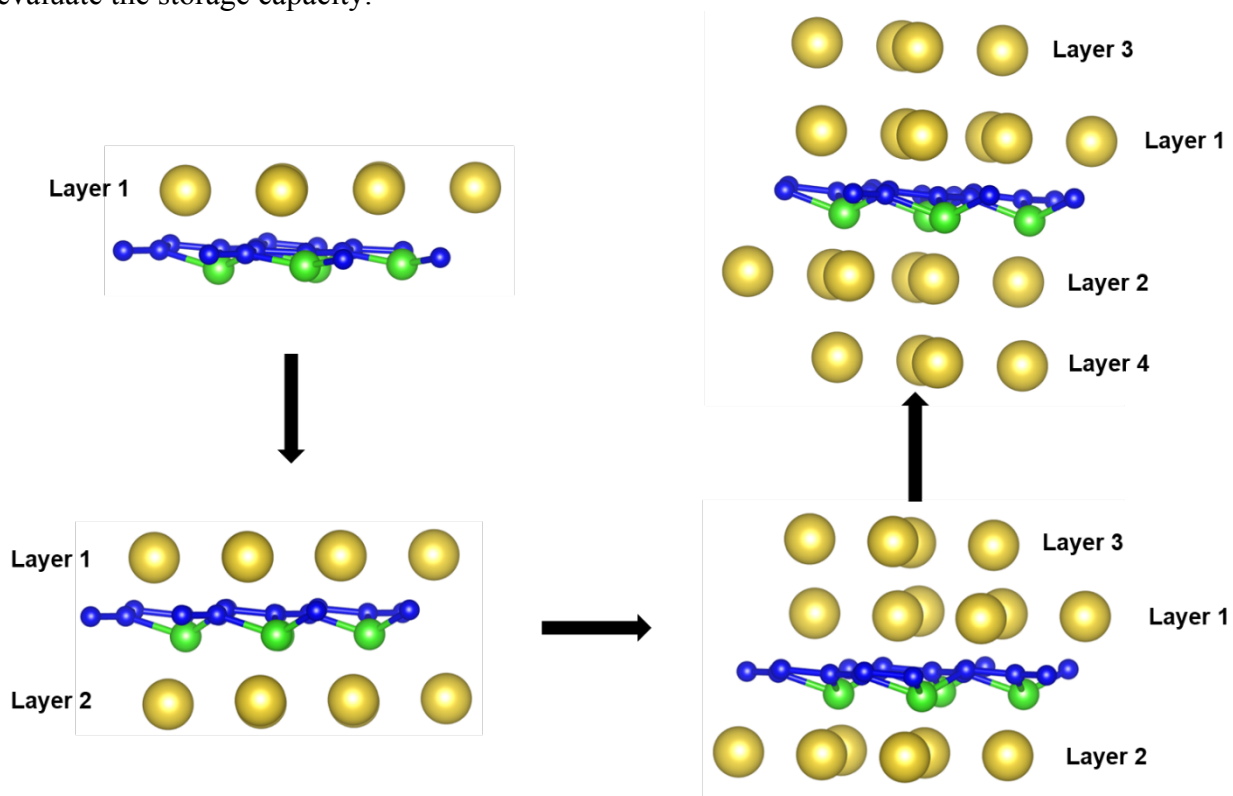

Fig. Stepwise formation of layer 1, layer 2, layer 3 and layer 4
